# Supplementary material for: How Rare Are Argonautoidea Octopuses in the Mediterranean? New Data from Stranding Events, Stomach Contents and Genetics
Source: MDPI journal article supplement (doi:10.3390/biology12030420), 2023-03-09
Supplement: s1 [file s1]

SUPPLEMENTARY MATERIALS

Battaglia et al. - How rare are Argonautoidea octopuses in the Mediterranean? New data from stranding events, stomach contents and genetics.

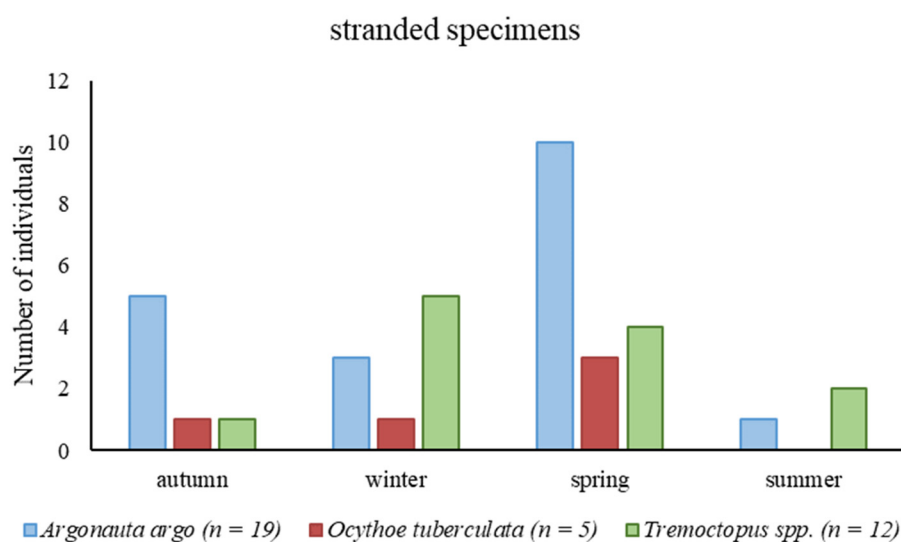

Figure S1. Number of stranded specimens of *Argonauta argo*, *Ocythoe tuberculata* and *Tremoctopus violaceus* for each season.

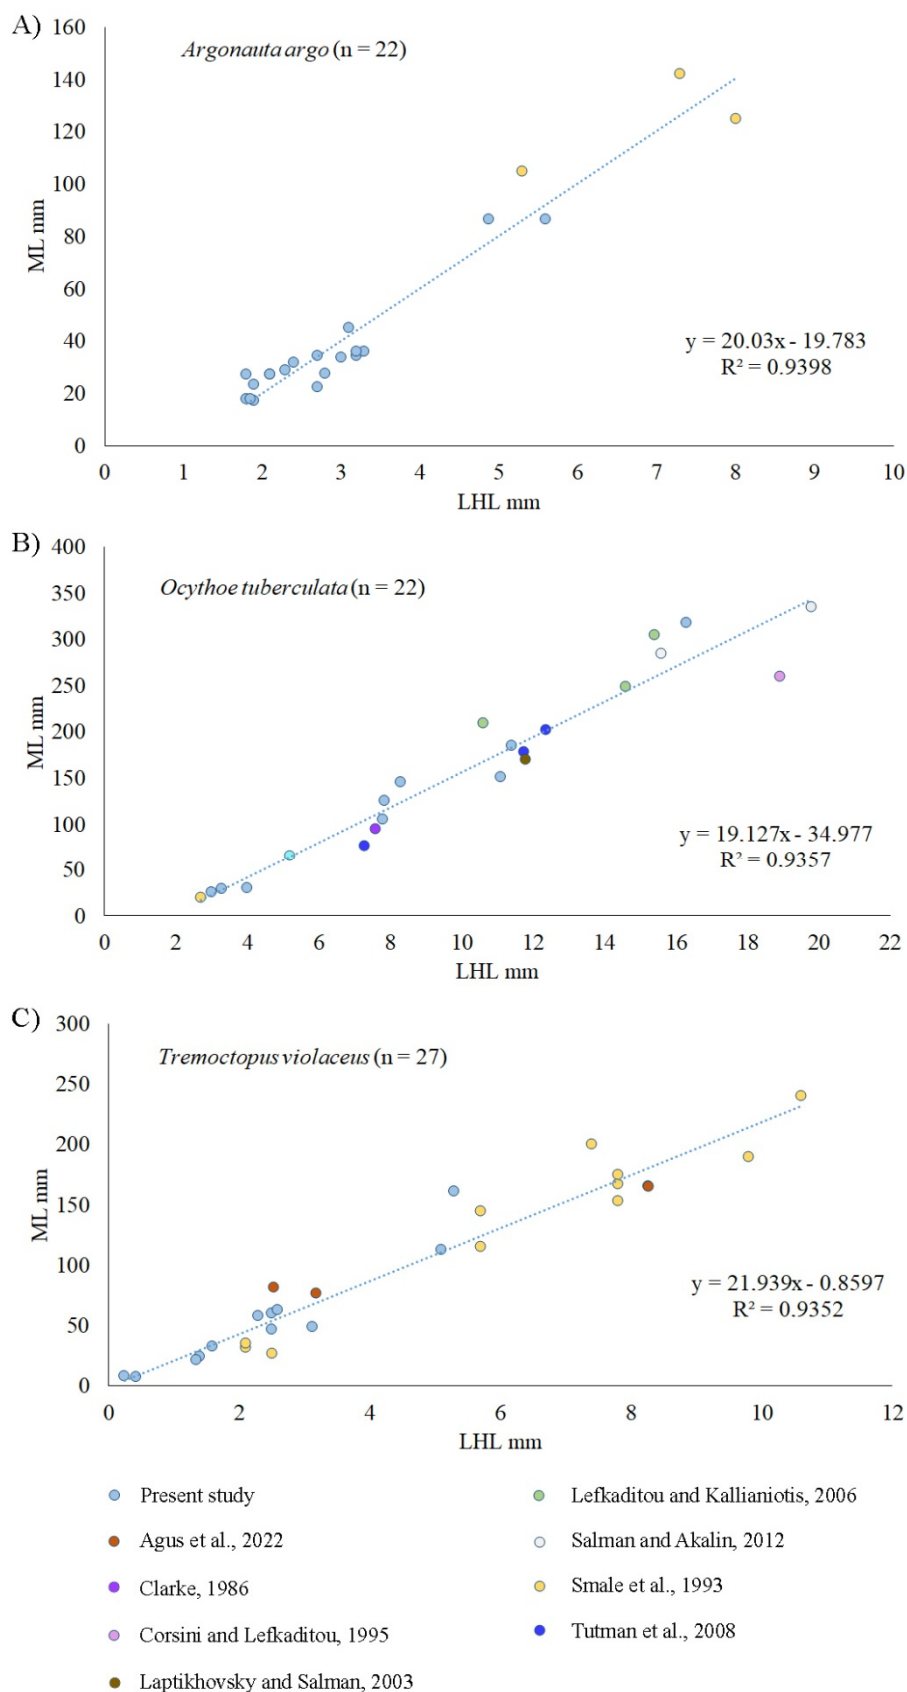

Figure S2. Relationship between beak size (lower hood length LHL) and mantle length (ML) in *Argonauta argo* (A), *Ocythoe tuberculata* (B) and *Tremoctopus violaceus* (C).

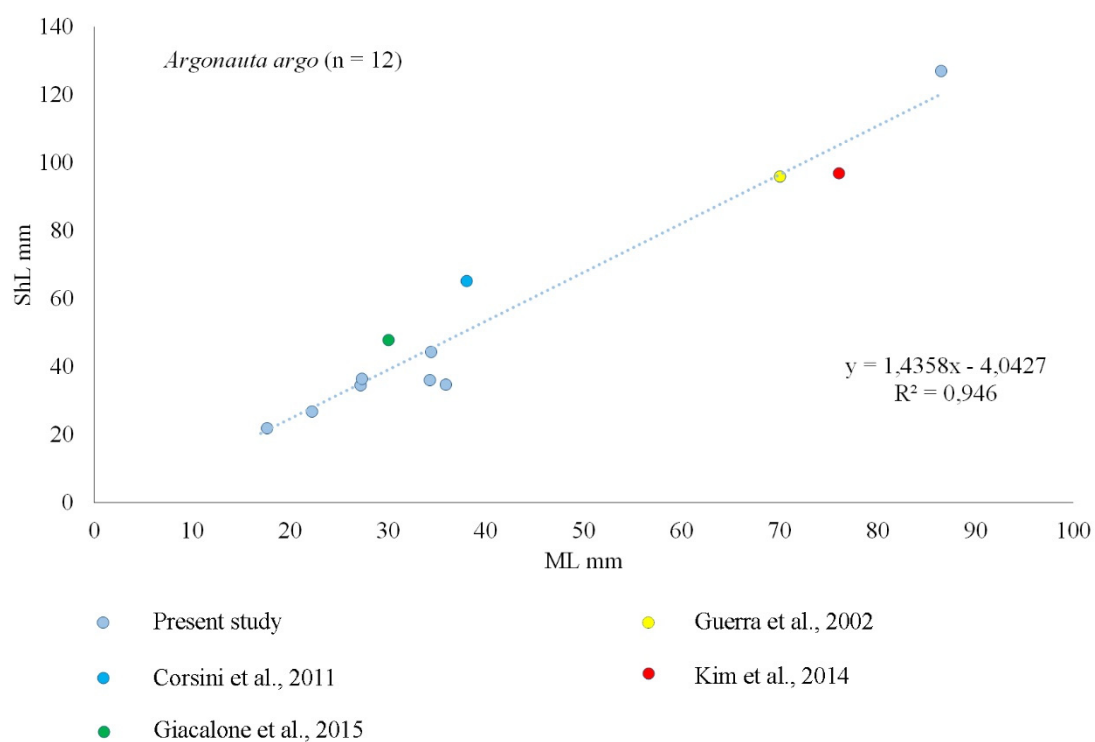

Figure S3. Relationship between shell length (ShL) and dorsal mantle length for *Argonauta argo*.

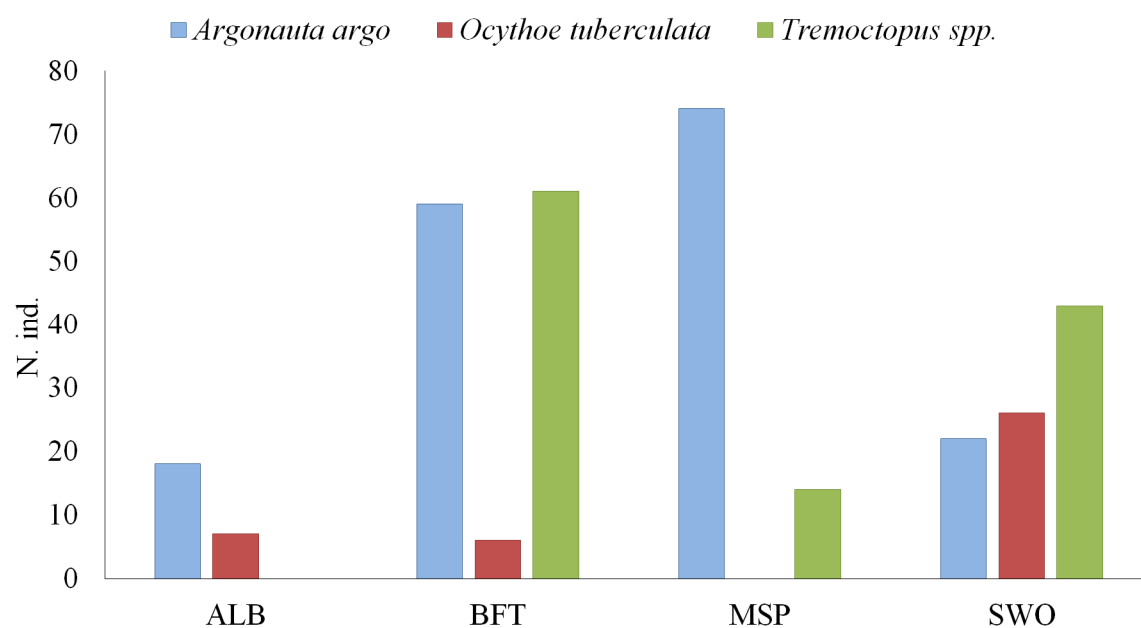

Figure S4. Number of cephalopod Argonautaidea found in the stomachs of pelagic predators (ALB = albacore; BFT = bluefin tuna; MSP = Mediterranean spearfish; SWO = swordfish)

Table S1. List of fresh Argonautoidea specimens collected.

| Species                      | Code   | Area              | Date        | ML mm  | Sex |
|------------------------------|--------|-------------------|-------------|--------|-----|
| <i>Argonauta argo</i>        | AA 001 | Strait of Messina | 24/03/2009  | 31.6   | F   |
|                              | AA 002 | Strait of Messina | 16/11/2008  | 23.2   | F   |
|                              | AA 003 | Strait of Messina | 19/05/2010  | 27.2   | F   |
|                              | AA 004 | Strait of Messina | 19/05/2010  | 27.3   | F   |
|                              | AA 005 | Strait of Messina | 05/03/2011  | 86.4   | F   |
|                              | AA 006 | Strait of Messina | 28/10/2011  | 86.5   | F   |
|                              | AA 007 | Strait of Messina | 10/11/2012  | 27.6   | F   |
|                              | AA 008 | Strait of Messina | 03/04/2012  | 45.1   | F   |
|                              | AA 009 | Strait of Messina | 06/07/2012  | 34.4   | F   |
|                              | AA 010 | Strait of Messina | 20/06/2019  | 17     | F   |
|                              | AA 011 | Strait of Messina | 06/05/2020  | 17.8   | F   |
|                              | AA 012 | Strait of Messina | 19/01/2014  | 27.3   | F   |
|                              | AA 013 | Strait of Messina | 21/10/2020  | 17.65  | F   |
|                              | AA 014 | Strait of Messina | 11/04/2021  | 22.2   | F   |
|                              | AA 015 | Strait of Messina | 07/02/2021  | 34.4   | F   |
|                              | AA 016 | Strait of Messina | 06/04/2018  | 35.9   | F   |
|                              | AA 018 | Strait of Messina | 08/05/2016  | 35.9   | F   |
|                              | AA 019 | Strait of Messina | 08/05/2016  | 33.6   | F   |
|                              | AA 020 | Strait of Messina | 15/11/2016  | 28.7   | F   |
|                              | AA 021 | Strait of Messina | spring 1982 | 6.161  | M   |
| <i>Ocythoe tuberculata</i>   | OT 001 | Milazzo           | 17/03/2009  | 145.6  | F   |
|                              | OT 002 | Strait of Messina | 11/05/2008  | 24.1   | M   |
|                              | OT 003 | Gulf of Patti     | spring 2017 | 150.42 | F   |
|                              | OT 004 | Finale di Pollina | 29/03/2021  | 318    | F   |
|                              | OT 005 | Milazzo           | 17/02/2018  | 125.1  | F   |
|                              | OT 006 | Strait of Messina | 11/05/2008  | 28.9   | F   |
|                              | OT 007 | Strait of Messina | 17/06/1996  | 25     | F   |
|                              | OT 008 | Strait of Messina | 13/03/2002  | 30     | F   |
|                              | OT 009 | Strait of Messina | 30/09/2012  | 105    | F   |
| <i>Tremoctopus violaceus</i> | TV 001 | Strait of Messina | winter 1980 | 46.4   | F   |
|                              | TV 002 | Strait of Messina | winter 1980 | 48.5   | F   |
|                              | TV 003 | Strait of Messina | 23/08/2020  | 112.8  | F   |
|                              | TV 004 | Strait of Messina | 20/01/2021  | 7      | F   |
|                              | TV 005 | Strait of Messina | 21/01/2021  | 8      | F   |
|                              | TV 006 | Strait of Messina | 22/01/2021  | 32.75  | F   |
|                              | TV 009 | Strait of Messina | 03/07/2015  | 23.8   | F   |
|                              | TV 010 | Strait of Messina | 05/07/2012  | 21.3   | F   |
|                              | TV 011 | Strait of Messina | 19/12/2021  | 161    | F   |
|                              | TV 012 | Strait of Messina | 20/06/1999  | 60     | F   |
|                              | TV 013 | Strait of Messina | 20/06/1999  | 63     | F   |
|                              | TV 014 | Strait of Messina | 20/06/1999  | 58     | F   |
|                              | TV 015 | Strait of Messina | 15/05/2005  | 26.1   | M   |
| <i>Tremoctopus gracilis</i>  | TG 001 | Milazzo           | 17/01/2005  | 166    | F   |
|                              | TG 002 | Strait of Messina | 18/08/2014  | 150    | F   |
|                              | TG 003 | Mongiove          | 12/02/2022  | 70.3   | F   |
| <i>Tremoctopus</i> sp.       | TV 007 | Strait of Messina | 23/02/2021  | 7.5    | M   |
|                              | TV 008 | Strait of Messina | 23/02/2021  | 7.9    | M   |

Table S2. Total number of predator stomachs used in this study to collect data on the ingestion of holopelagic octopuses (ALB = albacore; BFT = bluefin tuna; MSP = Mediterranean spearfish; SWO = swordfish).

| Predator | Years     | n. stomachs | Size range (cm) | Size type | Reference study           |
|----------|-----------|-------------|-----------------|-----------|---------------------------|
| ALB      | 2005-2006 | 127         | 38.9 - 102.1    | FL        | [18] and unpublished data |
| BFT      | 1998-2000 | 139         | 6.3 - 49.5      | TL        | [16]                      |
| BFT      | 2010-2011 | 123         | 115 - 222       | FL        | [63]                      |
| BFT      | 2011      | 5           | 110 - 145       | FL        | Unpublished data          |
| BFT      | 2021      | 34          | 96 - 207        | FL        | Unpublished data          |
| MSP      | 2020      | 58          | 113 - 196       | LJFL      | [78]                      |
| MSP      | 2004-2006 | 53          | 105 - 195       | LJFL      | [66]                      |
| SWO      | 2004-2006 | 103         | 110 - 210       | LJFL      | [66]                      |
| SWO      | 2008      | 68          | 72 - 216        | LJFL      | Unpublished data          |
| SWO      | 2019      | 65          | 114 - 206       | LJFL      | Unpublished data          |
| SWO      | 2021      | 25          | 111 - 184       | LJFL      | Unpublished data          |

Tab. S3. List of the individuals considered for genetic analysis.

| Sample Code | Sampling area     | Species                      | Tissue type                         |
|-------------|-------------------|------------------------------|-------------------------------------|
| AA005       | Strait of Messina | <i>Argonauta argo</i>        | Muscle                              |
| AA015E      | Strait of Messina | <i>Argonauta argo</i>        | Muscle (hectocotylus inside shell)  |
| AA006       | Strait of Messina | <i>Argonauta argo</i>        | Muscle                              |
| AA006E      | Strait of Messina | <i>Argonauta argo</i>        | Muscle (hectocotylus inside shell)  |
| AA006U      | Strait of Messina | <i>Argonauta argo</i>        | Eggs                                |
| AA007       | Strait of Messina | <i>Argonauta argo</i>        | Muscle                              |
| AA008       | Strait of Messina | <i>Argonauta argo</i>        | Muscle                              |
| AA015       | Strait of Messina | <i>Argonauta argo</i>        | Muscle                              |
| OT005       | Milazzo           | <i>Ocythoe tuberculata</i>   | Muscle                              |
| OT005E      | Milazzo           | <i>Ocythoe tuberculata</i>   | Muscle (hectocotylus inside mantle) |
| TG002       | Strait of Messina | <i>Tremoctopus gracilis</i>  | Muscle                              |
| TG002U      | Strait of Messina | <i>Tremoctopus gracilis</i>  | Eggs with embryos                   |
| TG003       | Strait of Messina | <i>Tremoctopus gracilis</i>  | Muscle                              |
| TV006       | Strait of Messina | <i>Tremoctopus violaceus</i> | Muscle                              |
| TV008       | Strait of Messina | <i>Tremoctopus sp.</i>       | Muscle                              |
| TV011       | Strait of Messina | <i>Tremoctopus violaceus</i> | Muscle                              |

Table S4. Details of the COI sequences used in this study to compute phylogenetic tree of cephalopod individuals.

| GenBank AN | Taxonomy in GenBank          | Sampling area                              | Reference                     |
|------------|------------------------------|--------------------------------------------|-------------------------------|
| MW351786   | <i>Tremoctopus violaceus</i> | Yucatan peninsula, southern Gulf of Mexico | Santana-Cisneros, unpublished |
| MW351787   | <i>Tremoctopus violaceus</i> | Yucatan peninsula, southern Gulf of Mexico | Santana-Cisneros, unpublished |
| OM025233   | <i>Tremoctopus violaceus</i> | Apulia, Italy—Mediterranean Sea            | [41]                          |
| MN443917   | <i>Tremoctopus violaceus</i> | South Korea—Pacific Ocean                  | Kim, unpublished              |
| MN370032   | <i>Tremoctopus gracilis</i>  | -                                          | Sajikumar et al., unpublished |
| MW025168   | <i>Tremoctopus violaceus</i> | South Korea—Pacific Ocean                  | Oh et al., unpublished        |
| MH379648   | <i>Tremoctopus gracilis</i>  | India—Indian Ocean                         | Geetha et al., unpublished    |
| MN370034   | <i>Tremoctopus gracilis</i>  | -                                          | Sajikumar et al., unpublished |
| MN370033   | <i>Tremoctopus gracilis</i>  | -                                          | Sajikumar et al., unpublished |
| KY649286   | <i>Tremoctopus violaceus</i> | Taiwan—Pacific Ocean                       | [71]                          |
| AF377978   | <i>Tremoctopus violaceus</i> | Florida, U.S.A.—Atlantic Ocean             | [78]                          |
| MN560197   | <i>Tremoctopus sp.</i>       | Chile—Pacific Ocean                        | [79]                          |
| MK186001   | <i>Tremoctopus robsoni</i>   | New Zealand – Pacific Ocean                | [80]                          |
| AY557519   | <i>Ocythoe tuberculata</i>   | -                                          | [81]                          |
| KY947106   | <i>Ocythoe tuberculata</i>   | Korea                                      | [82]                          |
| LC596061   | <i>Argonauta argo</i>        | Oki Island, Japan                          | [75]                          |

## Reference

78. AA.VV. *Valutazione dello stato e della distribuzione dell'aguglia imperiale (Tetrapturus belone)*; Relazione finale, Misura a titolarità 1.40 lettere c) e i) del PO FEAMP 2014/2020; 2021. Available online: <https://www.regione.sicilia.it/sites/default/files/2022-03/Elenco%20misura%201.40%20al%2031.12.2021%20-%20anno%202021.pdf> (accessed on 15 october 2022).
79. Carlini, D.B.; Young, R.E.; Vecchione, M. A molecular phylogeny of the Octopoda (Mollusca: Cephalopoda) evaluated in light of morphological evidence. *Mol. Phylogenet. Evol.* **2001**, *21*, 388–397. <https://doi.org/10.1006/mpev.2001.1022>.
80. Carrasco, S.A.; Varela, A.I.; Ibáñez, C.M.; Sellanes, J.; Thiel, M. Paralarval and juvenile stages as a proxy for cephalopod diversity in the Juan Fernández and Desventuradas ecoregion, southeast Paific Ocean. *Bull. Mar. Sci.* **2020**, *96*, 263–280. <https://doi.org/10.5343/bms.2019.0055>.
81. Braid, H.E.; Bolstad, K.S. Cephalopod biodiversity of the Kermadec Islands: Implications for conservation and some future taxonomic priorities. *Invertebr. Syst.* **2019**, *33*, 402–425.
82. Lindgren, A.R.; Giribet, G.; Nishiguchi, M.K. A combined approach to the phylogeny of Cephalopoda (Mollusca). *Cladistics* **2004**, *20*, 454–486. <https://doi.org/10.1111/j.1096-0031.2004.00032.x>.
83. Kim, J.B.; Yang, J.H.; Kim, Y.; Lee, S.J. First record of a rare pelagic octopod, *Ocythoe tuberculata* (Cephalopoda: Ocythoidae), in Korea. *Anim. Cells Syst.* **2017**, *21*, 419–423. <https://doi.org/10.1080/19768354.2017.1377766>.
